# Supplementary material for: Cardiac radiation dose predicts survival in esophageal squamous cell carcinoma treated by definitive concurrent chemotherapy and intensity modulated radiotherapy
Source: PubMed Central journal article supplement (PMC7510071; doi:10.1186/s13014-020-01664-7), 2020-09-22
Supplement: 13014_2020_1664_MOESM2_ESM.pdf [file 13014_2020_1664_MOESM2_ESM.pdf]

## Additional file 2

**Table S1.** Summary of the Chemotherapy Regimens and Radiation Doses

| <b>Chemotherapy regimen and radiation dose</b>                                                                               | <b>Number (%)</b> |
|------------------------------------------------------------------------------------------------------------------------------|-------------------|
| <b>Cases with pre-existing cardiovascular disease (n = 6)</b>                                                                |                   |
| <b>Chemotherapy regimen</b>                                                                                                  |                   |
| P (25 mg/m <sup>2</sup> ) + F (1000 mg/m <sup>2</sup> ) QW                                                                   | 3 (2.5)           |
| F (2000 mg/m <sup>2</sup> ) + Carboplatin (AUC 4) Q2W                                                                        | 1 (0.8)           |
| T (50 mg/m <sup>2</sup> ) + Carboplatin (AUC 2) QW                                                                           | 1 (0.8)           |
| P (40 mg/m <sup>2</sup> ) QW                                                                                                 | 1 (0.8)           |
| <b>Radiation Dose (Gy)</b>                                                                                                   |                   |
| Median (Range)                                                                                                               | 61.2 (50-66.6)    |
| <b>Cases without pre-existing cardiovascular disease (n = 115)</b>                                                           |                   |
| <b>Chemotherapy regimen</b>                                                                                                  |                   |
| P (25 mg/m <sup>2</sup> ) + F (1000 mg/m <sup>2</sup> ) QW                                                                   | 56 (46.3)         |
| P (20 mg/m <sup>2</sup> daily, D1-4) + F (800 mg/m <sup>2</sup> daily, D1-4) Q4W                                             | 31 (25.6)         |
| P (25-40 mg/m <sup>2</sup> ) + F (2000-2600 mg/m <sup>2</sup> ) + L (200-300 mg/m <sup>2</sup> ) Q2W                         | 9 (7.4)           |
| P (20-25 mg/m <sup>2</sup> ) + F (1500-2000 mg/m <sup>2</sup> ) + L (150-200 mg/m <sup>2</sup> ) QW                          | 9 (7.4)           |
| P (25 mg/m <sup>2</sup> ) + F (2000 mg/m <sup>2</sup> ) + L (200 mg/m <sup>2</sup> ) + Cet (400 → 250 mg/m <sup>2</sup> ) QW | 1 (0.8)           |
| P (20 mg/m <sup>2</sup> ) + F (1600 mg/m <sup>2</sup> ) + L (160 mg/m <sup>2</sup> ) + E (30 mg/m <sup>2</sup> ) QW          | 1 (0.8)           |
| F (1600 mg/m <sup>2</sup> ) QW                                                                                               | 1 (0.8)           |
| F (1600 mg/m <sup>2</sup> ) + L (160 mg/m <sup>2</sup> ) QW                                                                  | 1 (0.8)           |
| T (80 mg/m <sup>2</sup> ) + P (15 mg/m <sup>2</sup> ) QW                                                                     | 2 (1.7)           |
| T (35 mg/m <sup>2</sup> ) + P (15 mg/m <sup>2</sup> ) + Cet (400 → 250 mg/m <sup>2</sup> ) QW                                | 1 (0.8)           |
| P (40 mg/m <sup>2</sup> ) QW                                                                                                 | 1 (0.8)           |
| Docetaxel (35 mg/m <sup>2</sup> ) + P (35 mg/m <sup>2</sup> ) + F (1500 mg/m <sup>2</sup> ) Q2W                              | 1 (0.8)           |
| T (110 mg/m <sup>2</sup> ) + P (40 mg/m <sup>2</sup> ) + F (3000 mg/m <sup>2</sup> ) + L (400 mg/m <sup>2</sup> ) Q2W        | 1 (0.8)           |
| <b>Radiation Dose (Gy)</b>                                                                                                   |                   |
| Median (Range)                                                                                                               | 61.2 (50-66.6)    |

Abbreviations: *Cet* cetuximab, *D* day, *E* etoposide, *F* fluorouracil, *L* leucovorin, *P* cisplatin, *QW* weekly, *Q2W* every 2 weeks, *Q4W* every 4 weeks, *T* paclitaxel
