# Supplementary material for: Cardiac radiation dose predicts survival in esophageal squamous cell carcinoma treated by definitive concurrent chemotherapy and intensity modulated radiotherapy
Source: PubMed Central journal article supplement (PMC7510071; doi:10.1186/s13014-020-01664-7), 2020-09-22
Supplement: 13014_2020_1664_MOESM3_ESM.pdf [file 13014_2020_1664_MOESM3_ESM.pdf]

## Additional file 3

**Table S2.** Multivariate Analysis for Mean Heart Dose and Overall Survival

|                                                        | Variables                                                         | HR    | 95% CI      | <i>P</i> value |
|--------------------------------------------------------|-------------------------------------------------------------------|-------|-------------|----------------|
| <b>Model</b><br><b>Mean heart dose/ Mean lung dose</b> | Body mass index (kg/m <sup>2</sup> ) ( $\leq 21.3$ vs. $> 21.3$ ) | 1.747 | 0.889-3.432 | 0.105          |
|                                                        | Body surface area (m <sup>2</sup> ) ( $\leq 1.65$ vs. $> 1.65$ )  | 1.179 | 0.589-2.363 | 0.642          |
|                                                        | ECOG performance status (0–1 vs. 2–3)                             | 0.235 | 0.118-0.472 | 0.000          |
|                                                        | Stage (I&II vs. III)                                              | 0.026 | 0.004-0.190 | 0.000          |
|                                                        | Heart volume (ml) ( $\leq 592$ vs. $> 592$ )                      | 0.691 | 0.414-1.153 | 0.157          |
|                                                        | Chemotherapy regimen (F vs. NF)                                   | 0.175 | 0.067-0.455 | 0.000          |
|                                                        | PTV prescribed to 36 Gy (ml) (continuous)                         | 0.997 | 0.996-0.999 | 0.003          |
|                                                        | PTV prescribed to 50 Gy (ml) (continuous)                         | 1.003 | 1.001-1.005 | 0.000          |
|                                                        | <b>Mean heart dose (cGy) (continuous)</b>                         | 1.000 | 1.000-1.000 | 0.052          |
|                                                        | <b>Mean lung dose (cGy) (continuous)</b>                          | 1.001 | 1.000-1.002 | 0.017          |
| <b>Model</b><br><b>Mean heart dose/ Lung V5</b>        | Body mass index (kg/m <sup>2</sup> ) ( $\leq 21.3$ vs. $> 21.3$ ) | 1.542 | 0.796-2.990 | 0.199          |
|                                                        | Body surface area (m <sup>2</sup> ) ( $\leq 1.65$ vs. $> 1.65$ )  | 1.454 | 0.749-2.824 | 0.269          |
|                                                        | ECOG performance status (0–1 vs. 2–3)                             | 0.267 | 0.136-0.524 | 0.000          |
|                                                        | Stage (I&II vs. III)                                              | 0.047 | 0.008-0.289 | 0.001          |
|                                                        | Heart volume (ml) ( $\leq 592$ vs. $> 592$ )                      | 0.720 | 0.431-1.203 | 0.210          |
|                                                        | Chemotherapy regimen (F vs. NF)                                   | 0.233 | 0.094-0.579 | 0.002          |
|                                                        | PTV prescribed to 36 Gy (ml) (continuous)                         | 0.998 | 0.997-1.000 | 0.016          |
|                                                        | PTV prescribed to 50 Gy (ml) (continuous)                         | 1.002 | 1.001-1.004 | 0.003          |
|                                                        | <b>Mean heart dose (cGy) (continuous)</b>                         | 1.000 | 1.000-1.000 | 0.068          |
|                                                        | <b>Lung V5 (%) (continuous)</b>                                   | 1.017 | 0.990-1.044 | 0.222          |
| <b>Model</b><br><b>Mean heart dose/ Lung V10</b>       | Body mass index (kg/m <sup>2</sup> ) ( $\leq 21.3$ vs. $> 21.3$ ) | 1.498 | 0.776-2.890 | 0.229          |
|                                                        | Body surface area (m <sup>2</sup> ) ( $\leq 1.65$ vs. $> 1.65$ )  | 1.458 | 0.751-2.831 | 0.265          |
|                                                        | ECOG performance status (0–1 vs. 2–3)                             | 0.257 | 0.130-0.509 | 0.000          |
|                                                        | Stage (I&II vs. III)                                              | 0.046 | 0.008-0.281 | 0.001          |
|                                                        | Heart volume (ml) ( $\leq 592$ vs. $> 592$ )                      | 0.705 | 0.421-1.183 | 0.186          |
|                                                        | Chemotherapy regimen (F vs. NF)                                   | 0.237 | 0.095-0.593 | 0.002          |
|                                                        | PTV prescribed to 36 Gy (ml) (continuous)                         | 0.998 | 0.997-1.000 | 0.019          |
|                                                        | PTV prescribed to 50 Gy (ml) (continuous)                         | 1.002 | 1.001-1.004 | 0.003          |
|                                                        | <b>Mean heart dose (cGy) (continuous)</b>                         | 1.000 | 1.000-1.000 | 0.034          |
|                                                        | <b>Lung V10 (%) (continuous)</b>                                  | 1.017 | 0.981-1.055 | 0.354          |

|              |                                  |                                                                   |       |             |       |
|--------------|----------------------------------|-------------------------------------------------------------------|-------|-------------|-------|
| <b>Model</b> | <b>Mean heart dose/ Lung V20</b> | Body mass index (kg/m <sup>2</sup> ) ( $\leq 21.3$ vs. $> 21.3$ ) | 1.484 | 0.772-2.853 | 0.236 |
|              |                                  | Body surface area (m <sup>2</sup> ) ( $\leq 1.65$ vs. $> 1.65$ )  | 1.383 | 0.710-2.694 | 0.341 |
|              |                                  | ECOG performance status (0–1 vs. 2–3)                             | 0.233 | 0.114-0.473 | 0.000 |
|              |                                  | Stage (I&II vs. III)                                              | 0.040 | 0.006-0.256 | 0.001 |
|              |                                  | Heart volume (ml) ( $\leq 592$ vs. $> 592$ )                      | 0.677 | 0.402-1.141 | 0.143 |
|              |                                  | Chemotherapy regimen (F vs. NF)                                   | 0.224 | 0.089-0.566 | 0.002 |
|              |                                  | PTV prescribed to 36 Gy (ml) (continuous)                         | 0.998 | 0.996-1.000 | 0.012 |
|              |                                  | PTV prescribed to 50 Gy (ml) (continuous)                         | 1.003 | 1.001-1.004 | 0.002 |
|              |                                  | <b>Mean heart dose (cGy) (continuous)</b>                         | 1.000 | 1.000-1.000 | 0.035 |
|              |                                  | <b>Lung V20 (%) (continuous)</b>                                  | 1.037 | 0.984-1.092 | 0.171 |
| <b>Model</b> | <b>Mean heart dose/ Lung V30</b> | Body mass index (kg/m <sup>2</sup> ) ( $\leq 21.3$ vs. $> 21.3$ ) | 1.499 | 0.777-2.891 | 0.227 |
|              |                                  | Body surface area (m <sup>2</sup> ) ( $\leq 1.65$ vs. $> 1.65$ )  | 1.390 | 0.710-2.718 | 0.337 |
|              |                                  | ECOG performance status (0–1 vs. 2–3)                             | 0.233 | 0.115-0.474 | 0.000 |
|              |                                  | Stage (I&II vs. III)                                              | 0.040 | 0.006-0.250 | 0.001 |
|              |                                  | Heart volume (ml) ( $\leq 592$ vs. $> 592$ )                      | 0.667 | 0.393-1.130 | 0.132 |
|              |                                  | Chemotherapy regimen (F vs. NF)                                   | 0.240 | 0.097-0.594 | 0.002 |
|              |                                  | PTV prescribed to 36 Gy (ml) (continuous)                         | 0.998 | 0.996-1.000 | 0.013 |
|              |                                  | PTV prescribed to 50 Gy (ml) (continuous)                         | 1.003 | 1.001-1.004 | 0.002 |
|              |                                  | <b>Mean heart dose (cGy) (continuous)</b>                         | 1.000 | 1.000-1.000 | 0.022 |
|              |                                  | <b>Lung V30 (%) (continuous)</b>                                  | 1.042 | 0.980-1.107 | 0.190 |
| <b>Model</b> | <b>Mean heart dose/ Lung V40</b> | Body mass index (kg/m <sup>2</sup> ) ( $\leq 21.3$ vs. $> 21.3$ ) | 1.476 | 0.763-2.855 | 0.248 |
|              |                                  | Body surface area (m <sup>2</sup> ) ( $\leq 1.65$ vs. $> 1.65$ )  | 1.441 | 0.738-2.811 | 0.284 |
|              |                                  | ECOG performance status (0–1 vs. 2–3)                             | 0.245 | 0.122-0.491 | 0.000 |
|              |                                  | Stage (I&II vs. III)                                              | 0.041 | 0.007-0.254 | 0.001 |
|              |                                  | Heart volume (ml) ( $\leq 592$ vs. $> 592$ )                      | 0.676 | 0.398-1.148 | 0.147 |
|              |                                  | Chemotherapy regimen (F vs. NF)                                   | 0.262 | 0.108-0.636 | 0.003 |
|              |                                  | PTV prescribed to 36 Gy (ml) (continuous)                         | 0.998 | 0.996-1.000 | 0.017 |
|              |                                  | PTV prescribed to 50 Gy (ml) (continuous)                         | 1.003 | 1.001-1.004 | 0.002 |
|              |                                  | <b>Mean heart dose (cGy) (continuous)</b>                         | 1.000 | 1.000-1.000 | 0.020 |
|              |                                  | <b>Lung V40 (%) (continuous)</b>                                  | 1.040 | 0.970-1.115 | 0.273 |

Abbreviations: *ECOG* Eastern Cooperative Oncology Group, *F* fluoropyrimidine-based, *NF* not fluoropyrimidine-based, *PTV* planning target volume, *V<sub>x</sub>* percentage of the heart volume receiving more than x gray
