# Supplementary material for: Cardiac radiation dose predicts survival in esophageal squamous cell carcinoma treated by definitive concurrent chemotherapy and intensity modulated radiotherapy
Source: PubMed Central journal article supplement (PMC7510071; doi:10.1186/s13014-020-01664-7), 2020-09-22
Supplement: 13014_2020_1664_MOESM4_ESM.pdf [file 13014_2020_1664_MOESM4_ESM.pdf]

## Additional file 4

**Table S3.** Multivariate Analysis for Heart V5 and Overall Survival

|                                                 | Variables                                                         | HR    | 95% CI      | P value |
|-------------------------------------------------|-------------------------------------------------------------------|-------|-------------|---------|
| <b>Model</b><br><b>Heart V5/ Mean lung dose</b> | Body mass index (kg/m <sup>2</sup> ) ( $\leq 21.3$ vs. $> 21.3$ ) | 1.742 | 0.891-3.407 | 0.105   |
|                                                 | Body surface area (m <sup>2</sup> ) ( $\leq 1.65$ vs. $> 1.65$ )  | 1.160 | 0.584-2.306 | 0.672   |
|                                                 | ECOG performance status (0–1 vs. 2–3)                             | 0.240 | 0.120-0.479 | 0.000   |
|                                                 | Stage (I&II vs. III)                                              | 0.029 | 0.004-0.208 | 0.000   |
|                                                 | Chemotherapy regimen (F vs. NF)                                   | 0.164 | 0.063-0.427 | 0.000   |
|                                                 | Heart volume (ml) ( $\leq 592$ vs. $> 592$ )                      | 0.723 | 0.439-1.191 | 0.203   |
|                                                 | PTV prescribed to 36 Gy (ml) (continuous)                         | 0.998 | 0.996-0.999 | 0.005   |
|                                                 | PTV prescribed to 50 Gy (ml) (continuous)                         | 1.003 | 1.001-1.004 | 0.001   |
|                                                 | <b>Heart V5 (%) (continuous)</b>                                  | 1.011 | 1.001-1.020 | 0.029   |
|                                                 | <b>Mean lung dose (cGy) (continuous)</b>                          | 1.001 | 1.000-1.002 | 0.024   |
| <b>Model</b><br><b>Heart V5/ Lung V5</b>        | Body mass index (kg/m <sup>2</sup> ) ( $\leq 21.3$ vs. $> 21.3$ ) | 1.547 | 0.801-2.991 | 0.194   |
|                                                 | Body surface area (m <sup>2</sup> ) ( $\leq 1.65$ vs. $> 1.65$ )  | 1.410 | 0.731-2.722 | 0.306   |
|                                                 | ECOG performance status (0–1 vs. 2–3)                             | 0.273 | 0.140-0.533 | 0.000   |
|                                                 | Stage (I&II vs. III)                                              | 0.050 | 0.008-0.307 | 0.001   |
|                                                 | Chemotherapy regimen (F vs. NF)                                   | 0.215 | 0.087-0.532 | 0.001   |
|                                                 | Heart volume (ml) ( $\leq 592$ vs. $> 592$ )                      | 0.763 | 0.464-1.256 | 0.288   |
|                                                 | PTV prescribed to 36 Gy (ml) (continuous)                         | 0.998 | 0.997-1.000 | 0.025   |
|                                                 | PTV prescribed to 50 Gy (ml) (continuous)                         | 1.002 | 1.001-1.004 | 0.005   |
|                                                 | <b>Heart V5 (%) (continuous)</b>                                  | 1.011 | 1.001-1.021 | 0.032   |
|                                                 | <b>Lung V5 (%) (continuous)</b>                                   | 1.015 | 0.988-1.042 | 0.291   |
| <b>Model</b><br><b>Heart V5/ Lung V10</b>       | Body mass index (kg/m <sup>2</sup> ) ( $\leq 21.3$ vs. $> 21.3$ ) | 1.512 | 0.785-2.910 | 0.216   |
|                                                 | Body surface area (m <sup>2</sup> ) ( $\leq 1.65$ vs. $> 1.65$ )  | 1.406 | 0.729-2.712 | 0.309   |
|                                                 | ECOG performance status (0–1 vs. 2–3)                             | 0.263 | 0.133-0.517 | 0.000   |
|                                                 | Stage (I&II vs. III)                                              | 0.049 | 0.008-0.300 | 0.001   |
|                                                 | Chemotherapy regimen (F vs. NF)                                   | 0.216 | 0.086-0.539 | 0.001   |
|                                                 | Heart volume (ml) ( $\leq 592$ vs. $> 592$ )                      | 0.753 | 0.454-1.247 | 0.270   |
|                                                 | PTV prescribed to 36 Gy (ml) (continuous)                         | 0.998 | 0.997-1.000 | 0.030   |
|                                                 | PTV prescribed to 50 Gy (ml) (continuous)                         | 1.002 | 1.001-1.004 | 0.005   |
|                                                 | <b>Heart V5 (%) (continuous)</b>                                  | 1.012 | 1.002-1.022 | 0.016   |
|                                                 | <b>Lung V10 (%) (continuous)</b>                                  | 1.016 | 0.979-1.055 | 0.406   |

|              |                          |                                                                   |       |             |       |
|--------------|--------------------------|-------------------------------------------------------------------|-------|-------------|-------|
| <b>Model</b> | <b>Heart V5/Lung V20</b> | Body mass index (kg/m <sup>2</sup> ) ( $\leq 21.3$ vs. $> 21.3$ ) | 1.506 | 0.785-2.888 | 0.218 |
|              |                          | Body surface area (m <sup>2</sup> ) ( $\leq 1.65$ vs. $> 1.65$ )  | 1.333 | 0.688-2.581 | 0.394 |
|              |                          | ECOG performance status (0–1 vs. 2–3)                             | 0.237 | 0.117-0.481 | 0.000 |
|              |                          | Stage (I&II vs. III)                                              | 0.043 | 0.007-0.273 | 0.001 |
|              |                          | Chemotherapy regimen (F vs. NF)                                   | 0.204 | 0.081-0.514 | 0.001 |
|              |                          | Heart volume (ml) ( $\leq 592$ vs. $> 592$ )                      | 0.716 | 0.429-1.196 | 0.202 |
|              |                          | PTV prescribed to 36 Gy (ml) (continuous)                         | 0.998 | 0.996-1.000 | 0.018 |
|              |                          | PTV prescribed to 50 Gy (ml) (continuous)                         | 1.002 | 1.001-1.004 | 0.003 |
|              |                          | <b>Heart V5 (%) (continuous)</b>                                  | 1.012 | 1.002-1.021 | 0.016 |
|              |                          | <b>Lung V20 (%) (continuous)</b>                                  | 1.036 | 0.982-1.092 | 0.195 |
| <b>Model</b> | <b>Heart V5/Lung V30</b> | Body mass index (kg/m <sup>2</sup> ) ( $\leq 21.3$ vs. $> 21.3$ ) | 1.522 | 0.791-2.928 | 0.208 |
|              |                          | Body surface area (m <sup>2</sup> ) ( $\leq 1.65$ vs. $> 1.65$ )  | 1.330 | 0.684-2.584 | 0.401 |
|              |                          | ECOG performance status (0–1 vs. 2–3)                             | 0.236 | 0.116-0.478 | 0.000 |
|              |                          | Stage (I&II vs. III)                                              | 0.042 | 0.007-0.265 | 0.001 |
|              |                          | Chemotherapy regimen (F vs. NF)                                   | 0.215 | 0.087-0.531 | 0.001 |
|              |                          | Heart volume (ml) ( $\leq 592$ vs. $> 592$ )                      | 0.702 | 0.418-1.179 | 0.182 |
|              |                          | PTV prescribed to 36 Gy (ml) (continuous)                         | 0.998 | 0.996-1.000 | 0.018 |
|              |                          | PTV prescribed to 50 Gy (ml) (continuous)                         | 1.003 | 1.001-1.004 | 0.003 |
|              |                          | <b>Heart V5 (%) (continuous)</b>                                  | 1.012 | 1.003-1.022 | 0.010 |
|              |                          | <b>Lung V30 (%) (continuous)</b>                                  | 1.044 | 0.980-1.111 | 0.180 |
| <b>Model</b> | <b>Heart V5/Lung V40</b> | Body mass index (kg/m <sup>2</sup> ) ( $\leq 21.3$ vs. $> 21.3$ ) | 1.498 | 0.776-2.889 | 0.228 |
|              |                          | Body surface area (m <sup>2</sup> ) ( $\leq 1.65$ vs. $> 1.65$ )  | 1.374 | 0.709-2.664 | 0.347 |
|              |                          | ECOG performance status (0–1 vs. 2–3)                             | 0.249 | 0.125-0.496 | 0.000 |
|              |                          | Stage (I&II vs. III)                                              | 0.043 | 0.007-0.270 | 0.001 |
|              |                          | Chemotherapy regimen (F vs. NF)                                   | 0.234 | 0.096-0.569 | 0.001 |
|              |                          | Heart volume (ml) ( $\leq 592$ vs. $> 592$ )                      | 0.713 | 0.424-1.201 | 0.204 |
|              |                          | PTV prescribed to 36 Gy (ml) (continuous)                         | 0.998 | 0.996-1.000 | 0.023 |
|              |                          | PTV prescribed to 50 Gy (ml) (continuous)                         | 1.003 | 1.001-1.004 | 0.004 |
|              |                          | <b>Heart V5 (%) (continuous)</b>                                  | 1.012 | 1.003-1.022 | 0.009 |
|              |                          | <b>Lung V40 (%) (continuous)</b>                                  | 1.043 | 0.971-1.120 | 0.249 |

Abbreviations: *ECOG* Eastern Cooperative Oncology Group, *F* fluoropyrimidine-based, *NF* not fluoropyrimidine-based, *PTV* planning target volume, *V<sub>x</sub>* percentage of the heart volume receiving more than x gray
