# Supplementary material for: Cardiac radiation dose predicts survival in esophageal squamous cell carcinoma treated by definitive concurrent chemotherapy and intensity modulated radiotherapy
Source: PubMed Central journal article supplement (PMC7510071; doi:10.1186/s13014-020-01664-7), 2020-09-22
Supplement: 13014_2020_1664_MOESM5_ESM.pdf [file 13014_2020_1664_MOESM5_ESM.pdf]

## Additional file 5

**Table S4.** Multivariate Analysis for Heart V10 and Overall Survival

|                                                  | Variables                                                         | HR    | 95% CI      | P value |
|--------------------------------------------------|-------------------------------------------------------------------|-------|-------------|---------|
| <b>Model</b><br><b>Heart V10/ Mean lung dose</b> | Body mass index (kg/m <sup>2</sup> ) ( $\leq 21.3$ vs. $> 21.3$ ) | 1.744 | 0.890-3.417 | 0.105   |
|                                                  | Body surface area (m <sup>2</sup> ) ( $\leq 1.65$ vs. $> 1.65$ )  | 1.155 | 0.580-2.299 | 0.682   |
|                                                  | ECOG performance status (0–1 vs. 2–3)                             | 0.240 | 0.120-0.479 | 0.000   |
|                                                  | Stage (I&II vs. III)                                              | 0.029 | 0.004-0.209 | 0.000   |
|                                                  | Chemotherapy regimen (F vs. NF)                                   | 0.165 | 0.064-0.429 | 0.000   |
|                                                  | Heart volume (ml) ( $\leq 592$ vs. $> 592$ )                      | 0.720 | 0.436-1.188 | 0.198   |
|                                                  | PTV prescribed to 36 Gy (ml) (continuous)                         | 0.998 | 0.996-0.999 | 0.004   |
|                                                  | PTV prescribed to 50 Gy (ml) (continuous)                         | 1.003 | 1.001-1.005 | 0.001   |
|                                                  | <b>Heart V10 (%) (continuous)</b>                                 | 1.010 | 1.001-1.019 | 0.032   |
|                                                  | <b>Mean lung dose (cGy) (continuous)</b>                          | 1.001 | 1.000-1.002 | 0.021   |
| <b>Model</b><br><b>Heart V10/ Lung V5</b>        | Body mass index (kg/m <sup>2</sup> ) ( $\leq 21.3$ vs. $> 21.3$ ) | 1.545 | 0.798-2.990 | 0.197   |
|                                                  | Body surface area (m <sup>2</sup> ) ( $\leq 1.65$ vs. $> 1.65$ )  | 1.410 | 0.729-2.726 | 0.307   |
|                                                  | ECOG performance status (0–1 vs. 2–3)                             | 0.271 | 0.139-0.532 | 0.000   |
|                                                  | Stage (I&II vs. III)                                              | 0.051 | 0.008-0.310 | 0.001   |
|                                                  | Chemotherapy regimen (F vs. NF)                                   | 0.217 | 0.088-0.538 | 0.001   |
|                                                  | Heart volume (ml) ( $\leq 592$ vs. $> 592$ )                      | 0.757 | 0.459-1.248 | 0.275   |
|                                                  | PTV prescribed to 36 Gy (ml) (continuous)                         | 0.998 | 0.997-1.000 | 0.022   |
|                                                  | PTV prescribed to 50 Gy (ml) (continuous)                         | 1.002 | 1.001-1.004 | 0.004   |
|                                                  | <b>Heart V10 (%) (continuous)</b>                                 | 1.010 | 1.001-1.020 | 0.039   |
|                                                  | <b>Lung V5 (%) (continuous)</b>                                   | 1.015 | 0.988-1.043 | 0.268   |
| <b>Model</b><br><b>Heart V10/ Lung V10</b>       | Body mass index (kg/m <sup>2</sup> ) ( $\leq 21.3$ vs. $> 21.3$ ) | 1.506 | 0.781-2.903 | 0.221   |
|                                                  | Body surface area (m <sup>2</sup> ) ( $\leq 1.65$ vs. $> 1.65$ )  | 1.407 | 0.728-2.719 | 0.309   |
|                                                  | ECOG performance status (0–1 vs. 2–3)                             | 0.262 | 0.133-0.517 | 0.000   |
|                                                  | Stage (I&II vs. III)                                              | 0.050 | 0.008-0.304 | 0.001   |
|                                                  | Chemotherapy regimen (F vs. NF)                                   | 0.219 | 0.088-0.546 | 0.001   |
|                                                  | Heart volume (ml) ( $\leq 592$ vs. $> 592$ )                      | 0.747 | 0.450-1.238 | 0.258   |
|                                                  | PTV prescribed to 36 Gy (ml) (continuous)                         | 0.998 | 0.997-1.000 | 0.028   |
|                                                  | PTV prescribed to 50 Gy (ml) (continuous)                         | 1.002 | 1.001-1.004 | 0.004   |
|                                                  | <b>Heart V10 (%) (continuous)</b>                                 | 1.011 | 1.002-1.020 | 0.020   |
|                                                  | <b>Lung V10 (%) (continuous)</b>                                  | 1.016 | 0.979-1.055 | 0.398   |

|       |                     |                                                                   |       |             |       |
|-------|---------------------|-------------------------------------------------------------------|-------|-------------|-------|
| Model | Heart V10/ Lung V20 | Body mass index (kg/m <sup>2</sup> ) ( $\leq 21.3$ vs. $> 21.3$ ) | 1.498 | 0.780-2.877 | 0.225 |
|       |                     | Body surface area (m <sup>2</sup> ) ( $\leq 1.65$ vs. $> 1.65$ )  | 1.335 | 0.688-2.588 | 0.393 |
|       |                     | ECOG performance status (0–1 vs. 2–3)                             | 0.237 | 0.117-0.481 | 0.000 |
|       |                     | Stage (I&II vs. III)                                              | 0.044 | 0.007-0.277 | 0.001 |
|       |                     | Chemotherapy regimen (F vs. NF)                                   | 0.207 | 0.082-0.521 | 0.001 |
|       |                     | Heart volume (ml) ( $\leq 592$ vs. $> 592$ )                      | 0.713 | 0.426-1.191 | 0.196 |
|       |                     | PTV prescribed to 36 Gy (ml) (continuous)                         | 0.998 | 0.996-1.000 | 0.017 |
|       |                     | PTV prescribed to 50 Gy (ml) (continuous)                         | 1.003 | 1.001-1.004 | 0.003 |
|       |                     | <b>Heart V10 (%) (continuous)</b>                                 | 1.011 | 1.002-1.020 | 0.020 |
|       |                     | <b>Lung V20 (%) (continuous)</b>                                  | 1.036 | 0.983-1.092 | 0.191 |
| Model | Heart V10/ Lung V30 | Body mass index (kg/m <sup>2</sup> ) ( $\leq 21.3$ vs. $> 21.3$ ) | 1.515 | 0.787-2.918 | 0.214 |
|       |                     | Body surface area (m <sup>2</sup> ) ( $\leq 1.65$ vs. $> 1.65$ )  | 1.332 | 0.684-2.591 | 0.399 |
|       |                     | ECOG performance status (0–1 vs. 2–3)                             | 0.236 | 0.116-0.478 | 0.000 |
|       |                     | Stage (I&II vs. III)                                              | 0.043 | 0.007-0.269 | 0.001 |
|       |                     | Chemotherapy regimen (F vs. NF)                                   | 0.219 | 0.088-0.540 | 0.001 |
|       |                     | Heart volume (ml) ( $\leq 592$ vs. $> 592$ )                      | 0.698 | 0.415-1.173 | 0.175 |
|       |                     | PTV prescribed to 36 Gy (ml) (continuous)                         | 0.998 | 0.996-1.000 | 0.016 |
|       |                     | PTV prescribed to 50 Gy (ml) (continuous)                         | 1.003 | 1.001-1.004 | 0.002 |
|       |                     | <b>Heart V10 (%) (continuous)</b>                                 | 1.011 | 1.003-1.020 | 0.012 |
|       |                     | <b>Lung V30 (%) (continuous)</b>                                  | 1.044 | 0.981-1.110 | 0.178 |
| Model | Heart V10/ Lung V40 | Body mass index (kg/m <sup>2</sup> ) ( $\leq 21.3$ vs. $> 21.3$ ) | 1.491 | 0.772-2.879 | 0.235 |
|       |                     | Body surface area (m <sup>2</sup> ) ( $\leq 1.65$ vs. $> 1.65$ )  | 1.376 | 0.709-2.671 | 0.345 |
|       |                     | ECOG performance status (0–1 vs. 2–3)                             | 0.248 | 0.124-0.494 | 0.000 |
|       |                     | Stage (I&II vs. III)                                              | 0.044 | 0.007-0.272 | 0.001 |
|       |                     | Chemotherapy regimen (F vs. NF)                                   | 0.238 | 0.097-0.579 | 0.002 |
|       |                     | Heart volume (ml) ( $\leq 592$ vs. $> 592$ )                      | 0.706 | 0.419-1.191 | 0.192 |
|       |                     | PTV prescribed to 36 Gy (ml) (continuous)                         | 0.998 | 0.996-1.000 | 0.021 |
|       |                     | PTV prescribed to 50 Gy (ml) (continuous)                         | 1.003 | 1.001-1.004 | 0.003 |
|       |                     | <b>Heart V10 (%) (continuous)</b>                                 | 1.012 | 1.003-1.021 | 0.010 |
|       |                     | <b>Lung V40 (%) (continuous)</b>                                  | 1.044 | 0.972-1.121 | 0.236 |

Abbreviations: *ECOG* Eastern Cooperative Oncology Group, *F* fluoropyrimidine-based, *NF* not fluoropyrimidine-based, *PTV* planning target volume, *V<sub>x</sub>* percentage of the heart volume receiving more than x gray
