# Supplementary material for: Cardiac radiation dose predicts survival in esophageal squamous cell carcinoma treated by definitive concurrent chemotherapy and intensity modulated radiotherapy
Source: PubMed Central journal article supplement (PMC7510071; doi:10.1186/s13014-020-01664-7), 2020-09-22
Supplement: 13014_2020_1664_MOESM6_ESM.pdf [file 13014_2020_1664_MOESM6_ESM.pdf]

## Additional file 6

**Table S5.** Multivariate Analysis for Heart V20 and Overall Survival

|                                                  | Variables                                                         | HR    | 95% CI      | P value |
|--------------------------------------------------|-------------------------------------------------------------------|-------|-------------|---------|
| <b>Model</b><br><b>Heart V20/ Mean lung dose</b> | Body mass index (kg/m <sup>2</sup> ) ( $\leq 21.3$ vs. $> 21.3$ ) | 1.748 | 0.889-3.437 | 0.105   |
|                                                  | Body surface area (m <sup>2</sup> ) ( $\leq 1.65$ vs. $> 1.65$ )  | 1.167 | 0.584-2.330 | 0.662   |
|                                                  | ECOG performance status (0–1 vs. 2–3)                             | 0.237 | 0.119-0.476 | 0.000   |
|                                                  | Stage (I&II vs. III)                                              | 0.029 | 0.004-0.208 | 0.000   |
|                                                  | Chemotherapy regimen (F vs. NF)                                   | 0.168 | 0.065-0.434 | 0.000   |
|                                                  | Heart volume (ml) ( $\leq 592$ vs. $> 592$ )                      | 0.709 | 0.428-1.174 | 0.181   |
|                                                  | PTV prescribed to 36 Gy (ml) (continuous)                         | 0.997 | 0.996-0.999 | 0.004   |
|                                                  | PTV prescribed to 50 Gy (ml) (continuous)                         | 1.003 | 1.001-1.005 | 0.001   |
|                                                  | <b>Heart V20 (%) (continuous)</b>                                 | 1.010 | 1.001-1.019 | 0.029   |
|                                                  | <b>Mean lung dose (cGy) (continuous)</b>                          | 1.001 | 1.000-1.002 | 0.021   |
| <b>Model</b><br><b>Heart V20/ Lung V5</b>        | Body mass index (kg/m <sup>2</sup> ) ( $\leq 21.3$ vs. $> 21.3$ ) | 1.545 | 0.796-3.000 | 0.198   |
|                                                  | Body surface area (m <sup>2</sup> ) ( $\leq 1.65$ vs. $> 1.65$ )  | 1.423 | 0.734-2.761 | 0.296   |
|                                                  | ECOG performance status (0–1 vs. 2–3)                             | 0.266 | 0.135-0.524 | 0.000   |
|                                                  | Stage (I&II vs. III)                                              | 0.050 | 0.008-0.306 | 0.001   |
|                                                  | Chemotherapy regimen (F vs. NF)                                   | 0.220 | 0.089-0.544 | 0.001   |
|                                                  | Heart volume (ml) ( $\leq 592$ vs. $> 592$ )                      | 0.740 | 0.446-1.226 | 0.243   |
|                                                  | PTV prescribed to 36 Gy (ml) (continuous)                         | 0.998 | 0.997-1.000 | 0.019   |
|                                                  | PTV prescribed to 50 Gy (ml) (continuous)                         | 1.002 | 1.001-1.004 | 0.004   |
|                                                  | <b>Heart V20 (%) (continuous)</b>                                 | 1.010 | 1.001-1.020 | 0.038   |
|                                                  | <b>Lung V5 (%) (continuous)</b>                                   | 1.015 | 0.988-1.042 | 0.280   |
| <b>Model</b><br><b>Heart V20/ Lung V10</b>       | Body mass index (kg/m <sup>2</sup> ) ( $\leq 21.3$ vs. $> 21.3$ ) | 1.507 | 0.779-2.915 | 0.223   |
|                                                  | Body surface area (m <sup>2</sup> ) ( $\leq 1.65$ vs. $> 1.65$ )  | 1.425 | 0.735-2.764 | 0.295   |
|                                                  | ECOG performance status (0–1 vs. 2–3)                             | 0.258 | 0.130-0.512 | 0.000   |
|                                                  | Stage (I&II vs. III)                                              | 0.050 | 0.008-0.301 | 0.001   |
|                                                  | Chemotherapy regimen (F vs. NF)                                   | 0.223 | 0.090-0.555 | 0.001   |
|                                                  | Heart volume (ml) ( $\leq 592$ vs. $> 592$ )                      | 0.731 | 0.439-1.218 | 0.229   |
|                                                  | PTV prescribed to 36 Gy (ml) (continuous)                         | 0.998 | 0.997-1.000 | 0.025   |
|                                                  | PTV prescribed to 50 Gy (ml) (continuous)                         | 1.002 | 1.001-1.004 | 0.004   |
|                                                  | <b>Heart V20 (%) (continuous)</b>                                 | 1.011 | 1.002-1.020 | 0.019   |
|                                                  | <b>Lung V10 (%) (continuous)</b>                                  | 1.015 | 0.978-1.053 | 0.436   |

|       |                     |                                                                   |       |             |       |
|-------|---------------------|-------------------------------------------------------------------|-------|-------------|-------|
| Model | Heart V20/ Lung V20 | Body mass index (kg/m <sup>2</sup> ) ( $\leq 21.3$ vs. $> 21.3$ ) | 1.497 | 0.776-2.885 | 0.229 |
|       |                     | Body surface area (m <sup>2</sup> ) ( $\leq 1.65$ vs. $> 1.65$ )  | 1.357 | 0.697-2.641 | 0.370 |
|       |                     | ECOG performance status (0–1 vs. 2–3)                             | 0.236 | 0.116-0.480 | 0.000 |
|       |                     | Stage (I&II vs. III)                                              | 0.044 | 0.007-0.278 | 0.001 |
|       |                     | Chemotherapy regimen (F vs. NF)                                   | 0.211 | 0.084-0.531 | 0.001 |
|       |                     | Heart volume (ml) ( $\leq 592$ vs. $> 592$ )                      | 0.703 | 0.419-1.177 | 0.180 |
|       |                     | PTV prescribed to 36 Gy (ml) (continuous)                         | 0.998 | 0.996-1.000 | 0.016 |
|       |                     | PTV prescribed to 50 Gy (ml) (continuous)                         | 1.003 | 1.001-1.004 | 0.003 |
|       |                     | <b>Heart V20 (%) (continuous)</b>                                 | 1.011 | 1.002-1.020 | 0.020 |
|       |                     | <b>Lung V20 (%) (continuous)</b>                                  | 1.034 | 0.980-1.090 | 0.221 |
| Model | Heart V20/ Lung V30 | Body mass index (kg/m <sup>2</sup> ) ( $\leq 21.3$ vs. $> 21.3$ ) | 1.513 | 0.783-2.924 | 0.218 |
|       |                     | Body surface area (m <sup>2</sup> ) ( $\leq 1.65$ vs. $> 1.65$ )  | 1.354 | 0.693-2.642 | 0.375 |
|       |                     | ECOG performance status (0–1 vs. 2–3)                             | 0.234 | 0.115-0.475 | 0.000 |
|       |                     | Stage (I&II vs. III)                                              | 0.043 | 0.007-0.269 | 0.001 |
|       |                     | Chemotherapy regimen (F vs. NF)                                   | 0.222 | 0.090-0.548 | 0.001 |
|       |                     | Heart volume (ml) ( $\leq 592$ vs. $> 592$ )                      | 0.687 | 0.408-1.157 | 0.158 |
|       |                     | PTV prescribed to 36 Gy (ml) (continuous)                         | 0.998 | 0.996-1.000 | 0.015 |
|       |                     | PTV prescribed to 50 Gy (ml) (continuous)                         | 1.003 | 1.001-1.004 | 0.002 |
|       |                     | <b>Heart V20 (%) (continuous)</b>                                 | 1.011 | 1.003-1.020 | 0.011 |
|       |                     | <b>Lung V30 (%) (continuous)</b>                                  | 1.041 | 0.979-1.107 | 0.198 |
| Model | Heart V20/ Lung V40 | Body mass index (kg/m <sup>2</sup> ) ( $\leq 21.3$ vs. $> 21.3$ ) | 1.489 | 0.769-2.884 | 0.238 |
|       |                     | Body surface area (m <sup>2</sup> ) ( $\leq 1.65$ vs. $> 1.65$ )  | 1.395 | 0.717-2.715 | 0.327 |
|       |                     | ECOG performance status (0–1 vs. 2–3)                             | 0.244 | 0.122-0.488 | 0.000 |
|       |                     | Stage (I&II vs. III)                                              | 0.043 | 0.007-0.269 | 0.001 |
|       |                     | Chemotherapy regimen (F vs. NF)                                   | 0.240 | 0.099-0.584 | 0.002 |
|       |                     | Heart volume (ml) ( $\leq 592$ vs. $> 592$ )                      | 0.691 | 0.409-1.168 | 0.168 |
|       |                     | PTV prescribed to 36 Gy (ml) (continuous)                         | 0.998 | 0.996-1.000 | 0.017 |
|       |                     | PTV prescribed to 50 Gy (ml) (continuous)                         | 1.003 | 1.001-1.004 | 0.003 |
|       |                     | <b>Heart V20 (%) (continuous)</b>                                 | 1.012 | 1.003-1.021 | 0.009 |
|       |                     | <b>Lung V40 (%) (continuous)</b>                                  | 1.043 | 0.973-1.119 | 0.236 |

Abbreviations: *ECOG* Eastern Cooperative Oncology Group, *F* fluoropyrimidine-based, *NF* not fluoropyrimidine-based, *PTV* planning target volume, *V<sub>x</sub>* percentage of the heart volume receiving more than x gray
