# Supplementary material for: Cardiac radiation dose predicts survival in esophageal squamous cell carcinoma treated by definitive concurrent chemotherapy and intensity modulated radiotherapy
Source: PubMed Central journal article supplement (PMC7510071; doi:10.1186/s13014-020-01664-7), 2020-09-22
Supplement: 13014_2020_1664_MOESM7_ESM.pdf [file 13014_2020_1664_MOESM7_ESM.pdf]

## Additional file 7

**Table S6.** Multivariate Analysis for Heart V30 and Overall Survival

|                                                  | Variables                                                         | HR    | 95% CI      | <i>P</i> value |
|--------------------------------------------------|-------------------------------------------------------------------|-------|-------------|----------------|
| <b>Model</b><br><b>Heart V30/ Mean lung dose</b> | Body mass index (kg/m <sup>2</sup> ) ( $\leq 21.3$ vs. $> 21.3$ ) | 1.757 | 0.893-3.456 | 0.102          |
|                                                  | Body surface area (m <sup>2</sup> ) ( $\leq 1.65$ vs. $> 1.65$ )  | 1.171 | 0.585-2.340 | 0.656          |
|                                                  | ECOG performance status (0–1 vs. 2–3)                             | 0.229 | 0.114-0.459 | 0.000          |
|                                                  | Stage (I&II vs. III)                                              | 0.029 | 0.004-0.205 | 0.000          |
|                                                  | Chemotherapy regimen (F vs. NF)                                   | 0.170 | 0.066-0.440 | 0.000          |
|                                                  | Heart volume (ml) ( $\leq 592$ vs. $> 592$ )                      | 0.696 | 0.417-1.161 | 0.166          |
|                                                  | PTV prescribed to 36 Gy (ml) (continuous)                         | 0.997 | 0.996-0.999 | 0.004          |
|                                                  | PTV prescribed to 50 Gy (ml) (continuous)                         | 1.003 | 1.001-1.004 | 0.001          |
|                                                  | <b>Heart V30 (%) (continuous)</b>                                 | 1.010 | 1.000-1.020 | 0.048          |
|                                                  | <b>Mean lung dose (cGy) (continuous)</b>                          | 1.001 | 1.000-1.002 | 0.017          |
| <b>Model</b><br><b>Heart V30/ Lung V5</b>        | Body mass index (kg/m <sup>2</sup> ) ( $\leq 21.3$ vs. $> 21.3$ ) | 1.556 | 0.801-3.021 | 0.192          |
|                                                  | Body surface area (m <sup>2</sup> ) ( $\leq 1.65$ vs. $> 1.65$ )  | 1.433 | 0.738-2.781 | 0.288          |
|                                                  | ECOG performance status (0–1 vs. 2–3)                             | 0.257 | 0.130-0.508 | 0.000          |
|                                                  | Stage (I&II vs. III)                                              | 0.050 | 0.008-0.303 | 0.001          |
|                                                  | Chemotherapy regimen (F vs. NF)                                   | 0.224 | 0.090-0.553 | 0.001          |
|                                                  | Heart volume (ml) ( $\leq 592$ vs. $> 592$ )                      | 0.724 | 0.433-1.211 | 0.218          |
|                                                  | PTV prescribed to 36 Gy (ml) (continuous)                         | 0.998 | 0.997-1.000 | 0.019          |
|                                                  | PTV prescribed to 50 Gy (ml) (continuous)                         | 1.002 | 1.001-1.004 | 0.005          |
|                                                  | <b>Heart V30 (%) (continuous)</b>                                 | 1.009 | 0.999-1.020 | 0.068          |
|                                                  | <b>Lung V5 (%) (continuous)</b>                                   | 1.016 | 0.990-1.043 | 0.230          |
| <b>Model</b><br><b>Heart V30/ Lung V10</b>       | Body mass index (kg/m <sup>2</sup> ) ( $\leq 21.3$ vs. $> 21.3$ ) | 1.513 | 0.782-2.927 | 0.219          |
|                                                  | Body surface area (m <sup>2</sup> ) ( $\leq 1.65$ vs. $> 1.65$ )  | 1.436 | 0.740-2.787 | 0.285          |
|                                                  | ECOG performance status (0–1 vs. 2–3)                             | 0.248 | 0.125-0.492 | 0.000          |
|                                                  | Stage (I&II vs. III)                                              | 0.050 | 0.008-0.297 | 0.001          |
|                                                  | Chemotherapy regimen (F vs. NF)                                   | 0.228 | 0.092-0.566 | 0.001          |
|                                                  | Heart volume (ml) ( $\leq 592$ vs. $> 592$ )                      | 0.712 | 0.424-1.195 | 0.199          |
|                                                  | PTV prescribed to 36 Gy (ml) (continuous)                         | 0.998 | 0.997-1.000 | 0.025          |
|                                                  | PTV prescribed to 50 Gy (ml) (continuous)                         | 1.002 | 1.001-1.004 | 0.005          |
|                                                  | <b>Heart V30 (%) (continuous)</b>                                 | 1.011 | 1.001-1.020 | 0.035          |
|                                                  | <b>Lung V10 (%) (continuous)</b>                                  | 1.016 | 0.980-1.054 | 0.389          |

|       |                     |                                                                   |       |             |       |
|-------|---------------------|-------------------------------------------------------------------|-------|-------------|-------|
| Model | Heart V30/ Lung V20 | Body mass index (kg/m <sup>2</sup> ) ( $\leq 21.3$ vs. $> 21.3$ ) | 1.498 | 0.778-2.887 | 0.227 |
|       |                     | Body surface area (m <sup>2</sup> ) ( $\leq 1.65$ vs. $> 1.65$ )  | 1.365 | 0.701-2.658 | 0.360 |
|       |                     | ECOG performance status (0–1 vs. 2–3)                             | 0.226 | 0.111-0.458 | 0.000 |
|       |                     | Stage (I&II vs. III)                                              | 0.044 | 0.007-0.273 | 0.001 |
|       |                     | Chemotherapy regimen (F vs. NF)                                   | 0.215 | 0.086-0.541 | 0.001 |
|       |                     | Heart volume (ml) ( $\leq 592$ vs. $> 592$ )                      | 0.685 | 0.407-1.155 | 0.156 |
|       |                     | PTV prescribed to 36 Gy (ml) (continuous)                         | 0.998 | 0.996-1.000 | 0.015 |
|       |                     | PTV prescribed to 50 Gy (ml) (continuous)                         | 1.002 | 1.001-1.004 | 0.003 |
|       |                     | <b>Heart V30 (%) (continuous)</b>                                 | 1.010 | 1.001-1.020 | 0.036 |
|       |                     | <b>Lung V20 (%) (continuous)</b>                                  | 1.036 | 0.983-1.091 | 0.189 |
| Model | Heart V30/ Lung V30 | Body mass index (kg/m <sup>2</sup> ) ( $\leq 21.3$ vs. $> 21.3$ ) | 1.515 | 0.784-2.927 | 0.217 |
|       |                     | Body surface area (m <sup>2</sup> ) ( $\leq 1.65$ vs. $> 1.65$ )  | 1.367 | 0.700-2.670 | 0.360 |
|       |                     | ECOG performance status (0–1 vs. 2–3)                             | 0.225 | 0.111-0.456 | 0.000 |
|       |                     | Stage (I&II vs. III)                                              | 0.043 | 0.007-0.265 | 0.001 |
|       |                     | Chemotherapy regimen (F vs. NF)                                   | 0.229 | 0.093-0.563 | 0.001 |
|       |                     | Heart volume (ml) ( $\leq 592$ vs. $> 592$ )                      | 0.672 | 0.397-1.140 | 0.141 |
|       |                     | PTV prescribed to 36 Gy (ml) (continuous)                         | 0.998 | 0.996-1.000 | 0.015 |
|       |                     | PTV prescribed to 50 Gy (ml) (continuous)                         | 1.003 | 1.001-1.004 | 0.003 |
|       |                     | <b>Heart V30 (%) (continuous)</b>                                 | 1.011 | 1.002-1.021 | 0.021 |
|       |                     | <b>Lung V30 (%) (continuous)</b>                                  | 1.041 | 0.980-1.107 | 0.191 |
| Model | Heart V30/ Lung V40 | Body mass index (kg/m <sup>2</sup> ) ( $\leq 21.3$ vs. $> 21.3$ ) | 1.489 | 0.768-2.886 | 0.238 |
|       |                     | Body surface area (m <sup>2</sup> ) ( $\leq 1.65$ vs. $> 1.65$ )  | 1.410 | 0.724-2.745 | 0.312 |
|       |                     | ECOG performance status (0–1 vs. 2–3)                             | 0.234 | 0.117-0.468 | 0.000 |
|       |                     | Stage (I&II vs. III)                                              | 0.043 | 0.007-0.265 | 0.001 |
|       |                     | Chemotherapy regimen (F vs. NF)                                   | 0.247 | 0.102-0.601 | 0.002 |
|       |                     | Heart volume (ml) ( $\leq 592$ vs. $> 592$ )                      | 0.675 | 0.397-1.149 | 0.147 |
|       |                     | PTV prescribed to 36 Gy (ml) (continuous)                         | 0.998 | 0.996-1.000 | 0.018 |
|       |                     | PTV prescribed to 50 Gy (ml) (continuous)                         | 1.002 | 1.001-1.004 | 0.004 |
|       |                     | <b>Heart V30 (%) (continuous)</b>                                 | 1.011 | 1.002-1.021 | 0.016 |
|       |                     | <b>Lung V40 (%) (continuous)</b>                                  | 1.044 | 0.974-1.118 | 0.226 |

Abbreviations: *ECOG* Eastern Cooperative Oncology Group, *F* fluoropyrimidine-based, *NF* not fluoropyrimidine-based, *PTV* planning target volume, *V<sub>x</sub>* percentage of the heart volume receiving more than x gray
