# Supplementary material for: Cardiac radiation dose predicts survival in esophageal squamous cell carcinoma treated by definitive concurrent chemotherapy and intensity modulated radiotherapy
Source: PubMed Central journal article supplement (PMC7510071; doi:10.1186/s13014-020-01664-7), 2020-09-22
Supplement: 13014_2020_1664_MOESM8_ESM.pdf [file 13014_2020_1664_MOESM8_ESM.pdf]

## Additional file 8

**Table S7.** Multivariate Analysis for Heart V40 and Overall Survival

|                                                  | Variables                                                         | HR          | 95% CI      | <i>P</i> value |
|--------------------------------------------------|-------------------------------------------------------------------|-------------|-------------|----------------|
| <b>Model</b><br><b>Heart V40/ Mean lung dose</b> | Body mass index (kg/m <sup>2</sup> ) ( $\leq 21.3$ vs. $> 21.3$ ) | 1.725       | 0.883-3.372 | 0.111          |
|                                                  | Body surface area (m <sup>2</sup> ) ( $\leq 1.65$ vs. $> 1.65$ )  | 1.190       | 0.596-2.374 | 0.622          |
|                                                  | ECOG performance status (0–1 vs. 2–3)                             | 0.226       | 0.113-0.455 | 0.000          |
|                                                  | Stage (I&II vs. III)                                              | 0.025       | 0.004-0.182 | 0.000          |
|                                                  | Chemotherapy regimen (F vs. NF)                                   | 0.174       | 0.067-0.451 | 0.000          |
|                                                  | Heart volume (ml) ( $\leq 592$ vs. $> 592$ )                      | 0.673       | 0.400-1.132 | 0.136          |
|                                                  | PTV prescribed to 36 Gy (ml) (continuous)                         | 0.997       | 0.996-0.999 | 0.002          |
|                                                  | PTV prescribed to 50 Gy (ml) (continuous)                         | 1.003       | 1.001-1.005 | 0.000          |
|                                                  | <b>Heart V40 (%) (continuous)</b>                                 | 1.011       | 1.001-1.022 | 0.034          |
|                                                  | <b>Mean lung dose (cGy) (continuous)</b>                          | 1.001       | 1.000-1.002 | 0.012          |
| <b>Model</b><br><b>Heart V40/ Lung V5</b>        | Body mass index (kg/m <sup>2</sup> ) ( $\leq 21.3$ vs. $> 21.3$ ) | 1.526       | 0.790-2.946 | 0.208          |
|                                                  | Body surface area (m <sup>2</sup> ) ( $\leq 1.65$ vs. $> 1.65$ )  | 1.467       | 0.758-2.841 | 0.255          |
|                                                  | ECOG performance status (0–1 vs. 2–3)                             | 0.257       | 0.130-0.507 | 0.000          |
|                                                  | Stage (I&II vs. III)                                              | 0.046       | 0.008-0.282 | 0.001          |
|                                                  | Chemotherapy regimen (F vs. NF)                                   | 0.231       | 0.093-0.574 | 0.002          |
|                                                  | Heart volume (ml) ( $\leq 592$ vs. $> 592$ )                      | 0.700       | 0.414-1.182 | 0.182          |
|                                                  | PTV prescribed to 36 Gy (ml) (continuous)                         | 0.998       | 0.996-1.000 | 0.013          |
|                                                  | PTV prescribed to 50 Gy (ml) (continuous)                         | 1.002       | 1.001-1.004 | 0.003          |
|                                                  | <b>Heart V40 (%) (continuous)</b>                                 | 1.011       | 1.000-1.022 | 0.053          |
| <b>Lung V5 (%) (continuous)</b>                  | 1.018                                                             | 0.993-1.044 | 0.164       |                |
| <b>Model</b><br><b>Heart V40/ Lung V10</b>       | Body mass index (kg/m <sup>2</sup> ) ( $\leq 21.3$ vs. $> 21.3$ ) | 1.474       | 0.768-2.829 | 0.244          |
|                                                  | Body surface area (m <sup>2</sup> ) ( $\leq 1.65$ vs. $> 1.65$ )  | 1.472       | 0.761-2.846 | 0.250          |
|                                                  | ECOG performance status (0–1 vs. 2–3)                             | 0.246       | 0.124-0.489 | 0.000          |
|                                                  | Stage (I&II vs. III)                                              | 0.045       | 0.007-0.274 | 0.001          |
|                                                  | Chemotherapy regimen (F vs. NF)                                   | 0.236       | 0.095-0.589 | 0.002          |
|                                                  | Heart volume (ml) ( $\leq 592$ vs. $> 592$ )                      | 0.685       | 0.404-1.160 | 0.159          |
|                                                  | PTV prescribed to 36 Gy (ml) (continuous)                         | 0.998       | 0.996-1.000 | 0.016          |
|                                                  | PTV prescribed to 50 Gy (ml) (continuous)                         | 1.002       | 1.001-1.004 | 0.003          |
|                                                  | <b>Heart V40 (%) (continuous)</b>                                 | 1.012       | 1.001-1.023 | 0.028          |
| <b>Lung V10 (%) (continuous)</b>                 | 1.019                                                             | 0.984-1.056 | 0.286       |                |

|       |                     |                                                                   |       |             |       |
|-------|---------------------|-------------------------------------------------------------------|-------|-------------|-------|
| Model | Heart V40/ Lung V20 | Body mass index (kg/m <sup>2</sup> ) ( $\leq 21.3$ vs. $> 21.3$ ) | 1.456 | 0.762-2.784 | 0.255 |
|       |                     | Body surface area (m <sup>2</sup> ) ( $\leq 1.65$ vs. $> 1.65$ )  | 1.397 | 0.720-2.709 | 0.323 |
|       |                     | ECOG performance status (0–1 vs. 2–3)                             | 0.223 | 0.110-0.452 | 0.000 |
|       |                     | Stage (I&II vs. III)                                              | 0.039 | 0.006-0.248 | 0.001 |
|       |                     | Chemotherapy regimen (F vs. NF)                                   | 0.224 | 0.089-0.564 | 0.002 |
|       |                     | Heart volume (ml) ( $\leq 592$ vs. $> 592$ )                      | 0.658 | 0.387-1.119 | 0.123 |
|       |                     | PTV prescribed to 36 Gy (ml) (continuous)                         | 0.998 | 0.996-0.999 | 0.009 |
|       |                     | PTV prescribed to 50 Gy (ml) (continuous)                         | 1.003 | 1.001-1.004 | 0.002 |
|       |                     | <b>Heart V40 (%) (continuous)</b>                                 | 1.012 | 1.001-1.022 | 0.028 |
|       |                     | <b>Lung V20 (%) (continuous)</b>                                  | 1.039 | 0.988-1.093 | 0.138 |
| Model | Heart V40/ Lung V30 | Body mass index (kg/m <sup>2</sup> ) ( $\leq 21.3$ vs. $> 21.3$ ) | 1.470 | 0.766-2.821 | 0.246 |
|       |                     | Body surface area (m <sup>2</sup> ) ( $\leq 1.65$ vs. $> 1.65$ )  | 1.406 | 0.722-2.740 | 0.316 |
|       |                     | ECOG performance status (0–1 vs. 2–3)                             | 0.224 | 0.110-0.455 | 0.000 |
|       |                     | Stage (I&II vs. III)                                              | 0.039 | 0.006-0.243 | 0.001 |
|       |                     | Chemotherapy regimen (F vs. NF)                                   | 0.243 | 0.099-0.598 | 0.002 |
|       |                     | Heart volume (ml) ( $\leq 592$ vs. $> 592$ )                      | 0.651 | 0.381-1.111 | 0.116 |
|       |                     | PTV prescribed to 36 Gy (ml) (continuous)                         | 0.998 | 0.996-0.999 | 0.011 |
|       |                     | PTV prescribed to 50 Gy (ml) (continuous)                         | 1.003 | 1.001-1.004 | 0.002 |
|       |                     | <b>Heart V40 (%) (continuous)</b>                                 | 1.012 | 1.002-1.023 | 0.019 |
|       |                     | <b>Lung V30 (%) (continuous)</b>                                  | 1.043 | 0.982-1.107 | 0.172 |
| Model | Heart V40/ Lung V40 | Body mass index (kg/m <sup>2</sup> ) ( $\leq 21.3$ vs. $> 21.3$ ) | 1.446 | 0.751-2.784 | 0.270 |
|       |                     | Body surface area (m <sup>2</sup> ) ( $\leq 1.65$ vs. $> 1.65$ )  | 1.459 | 0.751-2.836 | 0.265 |
|       |                     | ECOG performance status (0–1 vs. 2–3)                             | 0.234 | 0.117-0.470 | 0.000 |
|       |                     | Stage (I&II vs. III)                                              | 0.040 | 0.006-0.245 | 0.001 |
|       |                     | Chemotherapy regimen (F vs. NF)                                   | 0.265 | 0.109-0.642 | 0.003 |
|       |                     | Heart volume (ml) ( $\leq 592$ vs. $> 592$ )                      | 0.657 | 0.384-1.126 | 0.127 |
|       |                     | PTV prescribed to 36 Gy (ml) (continuous)                         | 0.998 | 0.996-1.000 | 0.015 |
|       |                     | PTV prescribed to 50 Gy (ml) (continuous)                         | 1.003 | 1.001-1.004 | 0.003 |
|       |                     | <b>Heart V40 (%) (continuous)</b>                                 | 1.013 | 1.002-1.023 | 0.017 |
|       |                     | <b>Lung V40 (%) (continuous)</b>                                  | 1.042 | 0.973-1.116 | 0.235 |

Abbreviations: *ECOG* Eastern Cooperative Oncology Group, *F* fluoropyrimidine-based, *NF* not fluoropyrimidine-based, *PTV* planning target volume, *V<sub>x</sub>* percentage of the heart volume receiving more than x gray
