# Supplementary material for: Cardiac radiation dose predicts survival in esophageal squamous cell carcinoma treated by definitive concurrent chemotherapy and intensity modulated radiotherapy
Source: PubMed Central journal article supplement (PMC7510071; doi:10.1186/s13014-020-01664-7), 2020-09-22
Supplement: 13014_2020_1664_MOESM9_ESM.pdf [file 13014_2020_1664_MOESM9_ESM.pdf]

## Additional file 9

**Table S8.** Multivariate Analysis for Heart V50 and Overall Survival

|                                                  | Variables                                                         | HR    | 95% CI      | <i>P</i> value |
|--------------------------------------------------|-------------------------------------------------------------------|-------|-------------|----------------|
| <b>Model</b><br><b>Heart V50/ Mean lung dose</b> | Body mass index (kg/m <sup>2</sup> ) ( $\leq 21.3$ vs. $> 21.3$ ) | 1.737 | 0.880-3.427 | 0.111          |
|                                                  | Body surface area (m <sup>2</sup> ) ( $\leq 1.65$ vs. $> 1.65$ )  | 1.199 | 0.590-2.437 | 0.615          |
|                                                  | ECOG performance status (0–1 vs. 2–3)                             | 0.234 | 0.117-0.469 | 0.000          |
|                                                  | Stage (I&II vs. III)                                              | 0.021 | 0.003-0.155 | 0.000          |
|                                                  | Chemotherapy regimen (F vs. NF)                                   | 0.193 | 0.073-0.508 | 0.001          |
|                                                  | Heart volume (ml) ( $\leq 592$ vs. $> 592$ )                      | 0.660 | 0.389-1.121 | 0.124          |
|                                                  | PTV prescribed to 36 Gy (ml) (continuous)                         | 0.997 | 0.995-0.999 | 0.002          |
|                                                  | PTV prescribed to 50 Gy (ml) (continuous)                         | 1.003 | 1.002-1.005 | 0.000          |
|                                                  | <b>Heart V50 (%) (continuous)</b>                                 | 1.014 | 1.000-1.027 | 0.046          |
|                                                  | <b>Mean lung dose (cGy) (continuous)</b>                          | 1.001 | 1.000-1.002 | 0.009          |
| <b>Model</b><br><b>Heart V50/ Lung V5</b>        | Body mass index (kg/m <sup>2</sup> ) ( $\leq 21.3$ vs. $> 21.3$ ) | 1.517 | 0.780-2.950 | 0.219          |
|                                                  | Body surface area (m <sup>2</sup> ) ( $\leq 1.65$ vs. $> 1.65$ )  | 1.520 | 0.772-2.991 | 0.225          |
|                                                  | ECOG performance status (0–1 vs. 2–3)                             | 0.269 | 0.137-0.529 | 0.000          |
|                                                  | Stage (I&II vs. III)                                              | 0.041 | 0.006-0.257 | 0.001          |
|                                                  | Chemotherapy regimen (F vs. NF)                                   | 0.264 | 0.104-0.669 | 0.005          |
|                                                  | Heart volume (ml) ( $\leq 592$ vs. $> 592$ )                      | 0.690 | 0.404-1.176 | 0.172          |
|                                                  | PTV prescribed to 36 Gy (ml) (continuous)                         | 0.998 | 0.996-1.000 | 0.012          |
|                                                  | PTV prescribed to 50 Gy (ml) (continuous)                         | 1.003 | 1.001-1.004 | 0.002          |
|                                                  | <b>Heart V50 (%) (continuous)</b>                                 | 1.012 | 0.999-1.026 | 0.077          |
|                                                  | <b>Lung V5 (%) (continuous)</b>                                   | 1.020 | 0.995-1.045 | 0.113          |
| <b>Model</b><br><b>Heart V50/ Lung V10</b>       | Body mass index (kg/m <sup>2</sup> ) ( $\leq 21.3$ vs. $> 21.3$ ) | 1.456 | 0.753-2.814 | 0.264          |
|                                                  | Body surface area (m <sup>2</sup> ) ( $\leq 1.65$ vs. $> 1.65$ )  | 1.528 | 0.777-3.004 | 0.219          |
|                                                  | ECOG performance status (0–1 vs. 2–3)                             | 0.256 | 0.129-0.507 | 0.000          |
|                                                  | Stage (I&II vs. III)                                              | 0.039 | 0.006-0.245 | 0.001          |
|                                                  | Chemotherapy regimen (F vs. NF)                                   | 0.273 | 0.107-0.695 | 0.006          |
|                                                  | Heart volume (ml) ( $\leq 592$ vs. $> 592$ )                      | 0.668 | 0.391-1.143 | 0.141          |
|                                                  | PTV prescribed to 36 Gy (ml) (continuous)                         | 0.998 | 0.996-1.000 | 0.014          |
|                                                  | PTV prescribed to 50 Gy (ml) (continuous)                         | 1.003 | 1.001-1.004 | 0.002          |
|                                                  | <b>Heart V50 (%) (continuous)</b>                                 | 1.014 | 1.001-1.028 | 0.042          |
|                                                  | <b>Lung V10 (%) (continuous)</b>                                  | 1.023 | 0.988-1.058 | 0.199          |

|       |                     |                                                                   |       |             |       |
|-------|---------------------|-------------------------------------------------------------------|-------|-------------|-------|
| Model | Heart V50/ Lung V20 | Body mass index (kg/m <sup>2</sup> ) ( $\leq 21.3$ vs. $> 21.3$ ) | 1.433 | 0.745-2.755 | 0.281 |
|       |                     | Body surface area (m <sup>2</sup> ) ( $\leq 1.65$ vs. $> 1.65$ )  | 1.440 | 0.729-2.842 | 0.294 |
|       |                     | ECOG performance status (0–1 vs. 2–3)                             | 0.228 | 0.113-0.464 | 0.000 |
|       |                     | Stage (I&II vs. III)                                              | 0.033 | 0.005-0.216 | 0.000 |
|       |                     | Chemotherapy regimen (F vs. NF)                                   | 0.260 | 0.101-0.668 | 0.005 |
|       |                     | Heart volume (ml) ( $\leq 592$ vs. $> 592$ )                      | 0.640 | 0.373-1.099 | 0.106 |
|       |                     | PTV prescribed to 36 Gy (ml) (continuous)                         | 0.998 | 0.996-0.999 | 0.008 |
|       |                     | PTV prescribed to 50 Gy (ml) (continuous)                         | 1.003 | 1.001-1.005 | 0.001 |
|       |                     | <b>Heart V50 (%) (continuous)</b>                                 | 1.014 | 1.001-1.028 | 0.038 |
|       |                     | <b>Lung V20 (%) (continuous)</b>                                  | 1.043 | 0.993-1.096 | 0.095 |
| Model | Heart V50/ Lung V30 | Body mass index (kg/m <sup>2</sup> ) ( $\leq 21.3$ vs. $> 21.3$ ) | 1.446 | 0.748-2.796 | 0.273 |
|       |                     | Body surface area (m <sup>2</sup> ) ( $\leq 1.65$ vs. $> 1.65$ )  | 1.456 | 0.732-2.895 | 0.284 |
|       |                     | ECOG performance status (0–1 vs. 2–3)                             | 0.233 | 0.115-0.472 | 0.000 |
|       |                     | Stage (I&II vs. III)                                              | 0.034 | 0.005-0.217 | 0.000 |
|       |                     | Chemotherapy regimen (F vs. NF)                                   | 0.288 | 0.115-0.720 | 0.008 |
|       |                     | Heart volume (ml) ( $\leq 592$ vs. $> 592$ )                      | 0.642 | 0.373-1.105 | 0.110 |
|       |                     | PTV prescribed to 36 Gy (ml) (continuous)                         | 0.998 | 0.996-0.999 | 0.011 |
|       |                     | PTV prescribed to 50 Gy (ml) (continuous)                         | 1.003 | 1.001-1.005 | 0.001 |
|       |                     | <b>Heart V50 (%) (continuous)</b>                                 | 1.014 | 1.001-1.028 | 0.035 |
|       |                     | <b>Lung V30 (%) (continuous)</b>                                  | 1.044 | 0.984-1.107 | 0.157 |
| Model | Heart V50/ Lung V40 | Body mass index (kg/m <sup>2</sup> ) ( $\leq 21.3$ vs. $> 21.3$ ) | 1.427 | 0.734-2.771 | 0.294 |
|       |                     | Body surface area (m <sup>2</sup> ) ( $\leq 1.65$ vs. $> 1.65$ )  | 1.520 | 0.764-3.023 | 0.232 |
|       |                     | ECOG performance status (0–1 vs. 2–3)                             | 0.248 | 0.124-0.496 | 0.000 |
|       |                     | Stage (I&II vs. III)                                              | 0.036 | 0.006-0.225 | 0.000 |
|       |                     | Chemotherapy regimen (F vs. NF)                                   | 0.316 | 0.129-0.775 | 0.012 |
|       |                     | Heart volume (ml) ( $\leq 592$ vs. $> 592$ )                      | 0.660 | 0.383-1.135 | 0.133 |
|       |                     | PTV prescribed to 36 Gy (ml) (continuous)                         | 0.998 | 0.996-1.000 | 0.018 |
|       |                     | PTV prescribed to 50 Gy (ml) (continuous)                         | 1.003 | 1.001-1.005 | 0.002 |
|       |                     | <b>Heart V50 (%) (continuous)</b>                                 | 1.014 | 1.001-1.028 | 0.040 |
|       |                     | <b>Lung V40 (%) (continuous)</b>                                  | 1.037 | 0.967-1.111 | 0.306 |

Abbreviations: *ECOG* Eastern Cooperative Oncology Group, *F* fluoropyrimidine-based, *NF* not fluoropyrimidine-based, *PTV* planning target volume, *V<sub>x</sub>* percentage of the heart volume receiving more than x gray
