# Supplementary material for: Cardiac radiation dose predicts survival in esophageal squamous cell carcinoma treated by definitive concurrent chemotherapy and intensity modulated radiotherapy
Source: PubMed Central journal article supplement (PMC7510071; doi:10.1186/s13014-020-01664-7), 2020-09-22
Supplement: 13014_2020_1664_MOESM10_ESM.pdf [file 13014_2020_1664_MOESM10_ESM.pdf]

## **Additional file 10**

**Table S9.** Multivariate Analysis for Lung Dose-volume Parameters and Overall Survival under Consideration of Different Heart Parameters

| Lung      | Mean heart dose     | Heart V5      | Heart V10     | Heart V20     | Heart V30     | Heart V40     | Heart V50     |
|-----------|---------------------|---------------|---------------|---------------|---------------|---------------|---------------|
|           | HR (95% CI) P value |               |               |               |               |               |               |
| Mean dose | 1.001               | 1.001         | 1.001         | 1.001         | 1.001         | 1.001         | 1.001         |
|           | (1.000-1.002)       | (1.000-1.002) | (1.000-1.002) | (1.000-1.002) | (1.000-1.002) | (1.000-1.002) | (1.000-1.002) |
|           | 0.017               | 0.024         | 0.021         | 0.021         | 0.017         | 0.012         | 0.009         |
| V5        | 1.017               | 1.015         | 1.015         | 1.015         | 1.016         | 1.018         | 1.020         |
|           | (0.990-1.044)       | (0.988-1.042) | (0.988-1.043) | (0.988-1.042) | (0.990-1.043) | (0.993-1.044) | (0.995-1.045) |
|           | 0.222               | 0.291         | 0.268         | 0.280         | 0.230         | 0.164         | 0.113         |
| V10       | 1.017               | 1.016         | 1.016         | 1.015         | 1.016         | 1.019         | 1.023         |
|           | (0.981-1.055)       | (0.979-1.055) | (0.979-1.055) | (0.978-1.053) | (0.980-1.054) | (0.984-1.056) | (0.988-1.058) |
|           | 0.354               | 0.406         | 0.398         | 0.436         | 0.389         | 0.286         | 0.199         |
| V20       | 1.037               | 1.036         | 1.036         | 1.034         | 1.036         | 1.039         | 1.043         |
|           | (0.984-1.092)       | (0.982-1.092) | (0.983-1.092) | (0.980-1.090) | (0.983-1.091) | (0.988-1.093) | (0.993-1.096) |
|           | 0.171               | 0.195         | 0.191         | 0.221         | 0.189         | 0.138         | 0.095         |
| V30       | 1.042               | 1.044         | 1.044         | 1.041         | 1.041         | 1.043         | 1.044         |
|           | (0.980-1.107)       | (0.980-1.111) | (0.981-1.110) | (0.979-1.107) | (0.980-1.107) | (0.982-1.107) | (0.984-1.107) |
|           | 0.190               | 0.180         | 0.178         | 0.198         | 0.191         | 0.172         | 0.157         |
| V40       | 1.040               | 1.043         | 1.044         | 1.043         | 1.044         | 1.042         | 1.037         |
|           | (0.970-1.115)       | (0.971-1.120) | (0.972-1.121) | (0.973-1.119) | (0.974-1.118) | (0.973-1.116) | (0.967-1.111) |
|           | 0.273               | 0.249         | 0.236         | 0.236         | 0.226         | 0.235         | 0.306         |
